# Supplementary material
Source: publisher site journal article supplement (https://www.dovepress.com/article/274943)
Supplement: Supplementary file 1 [file get_supplementary_file.php]

Supplementary Table 1. Survey questions and answers for (A) practitioners working in GP practice, (B) community pharmacists.

A.

| What is your profession? | GP/nurse practitioner/practice nurse/practice pharmacist |
| --- | --- |
| **Do you ever step-down asthma medication?** | Never |
|  | Infrequently |
|  | Sometimes |
|  | Often |
| **If you do, what is the main reason you would step-down asthma medication?** | Reduce side effects risk |
|  | Reduce NHS costs |
|  | Reduce medication burden |
|  | Guidelines advise to |
|  | Other |
| **What stops you stepping down asthma medication in a stable asthma patient?** | Was not aware I should be doing it |
| **TICK TOP THREE REASONS** | Not sure which patients I can safely step down |
|  | Not sure how to step down safely |
|  | Want to do it but no time to |
|  | Just don’t think to do it but know how |
|  | Not my role (specialist's role) |
|  | I try to but patients don’t want to |
|  | Don’t see the point of doing it  Other |
| **Are you aware of guidelines to step down asthma medication?** | Yes / No |
| **Do you feel confident how to step down a patient's medication?** | Yes / No |
| **How often do you review asthma patients medication?** | Never |
|  | Infrequently |
|  | Sometimes |
|  | Often |
| **If you do, when do you review a patient's asthma medication** | During annual review |
|  | During non-annual review asthma consultation  Other |
| What is your gender? | Male/female/other |
| What is your age (years)? | 20-29/30-39/40-49/50-59/60+ |
| Do you have a specific interest in asthma? | Yes / No |

B.

| **Do you ever discuss stepping down asthma medication with patients?** | Never |
| --- | --- |
|  | Infrequently |
|  | Sometimes |
|  | Often |
| **If you do, what is the main reason you would discuss it?** | Reduce side effects risk |
|  | Reduce NHS costs |
|  | Reduce medication burden |
|  | Guidelines advise to |
|  | Other |
| **Why do you not discuss stepping down asthma medication?** | No time to |
| **TICK 1 or 2 OF YOUR TOP REASONS** | Not sure how to |
|  | Not aware asthma patients should consider stepping down |
|  | Don’t have access to patient’s records |
|  | Not my role |
|  | Patient’s don’t bring it up |
|  | Other |
| **Do you ever discuss changing the asthma treatment dose with the patient?** | Never |
|  | Infrequently |
|  | Sometimes |
|  | Often |

Supplementary Table 2. Interview topic guide

| **Opening question** | **Prompts** |
| --- | --- |
| What is your job/role? |  |
| Have you had specific training in asthma? | If yes, when was that? What did that entail? |
| **Reviewing asthma meds** |  |
| Who see asthma reviews in your practice? Can you tell me about the asthma reviews in your practice(s)? How do you assess asthma control? How is medication managed? What prompts you to think about increasing asthma medication? What strategy do you use to step-up? Do you feel confident to step-up medication? | Whose role is it to do the annual review Is medication routinely reviewed? When do you review medication if you review it? When are the reviews carried out (annually, monthly, ad hoc)? How are reviews done (in person, phone, using EHR)? What influences your approach (guidelines, experience, education, colleagues)? Have you refined your strategy over time? How do you assess if patient's asthma is stable? If not refined it, why not? How often do you step up compared to step down? |
| **Perception of guidelines** |  |
| What do you think of the asthma guidelines? How do the guidelines influence your pharmacological management of asthma? What do you think about updates to the guidelines? Have the guidelines changed your practice over the last 5 years? What do you think about SMART or MART, maintenance and reliever regimens? | Do you have a preferred asthma guideline? How often do you use guidelines? When did you last look at them? Have you always used them (more or less as time has passed)? Do you know where guidelines refer to step-up? Do you know where guidelines refer to step-down? Do you use SMART/MART and how do you use them? |
| **Barriers to stepping down** |  |
| When would you decrease asthma medication? What strategy do you use to step-down? Do you feel confident to step-down medication? What are you views on stepping down? What do you think are the challenges of stepping down? How do you feel about engaging with patients regarding stepping down? The BTS guidelines say it is not done often, what do you think about that? What has been your experience if you have done it or tried to do it? | What influences your approach (guidelines, experience, education, colleagues)? Have you refined your strategy over time, if not why not? How often do you step-down? Why do you not step-down more often? Do the guidelines help you? How do patients respond to you if you do it? |
| **Facilitators to stepping down** |  |
| Are there strategies you have used or used in your practice that have helped you step-down if you do it? What do you think would help to increase the practice of stepping down? | Are you aware of FENO and would it help you? Would a pragmatic trial in GP setting to step down stable asthma patients and assess if have exacerbation or worse control help if showed positive findings? |
| **Any other comments?** |  |

Supplementary Table 3. Coding framework.

| **Major themes** | **Themes on stepping down barriers** | **Codes** |
| --- | --- | --- |
| **Reviewing asthma medication** |  | Reviews |
|  |  | Ad hoc |
|  |  | Annual |
|  |  | Tick box exercise  QOF |
|  |  | Asthma control |
|  |  | Questionnaires |
|  |  | Peak flow |
|  |  | Reliever use |
|  |  | Easy/happy to step up |
|  |  | Inhaler |
|  |  | Compliance/concordance |
|  |  | Technique |
| **Perception of guidelines** |  | Named guideline (BTS/NIC/CCG formulary |
|  |  | Two sets of guidelines |
|  |  | Visual |
|  |  | Clinical experience |
|  |  | SMART regimen |
|  |  | Inhaler names/acronyms |
| **Barriers to stepping down** | Self-efficacy | Vague guidelines |
|  | Lack of awareness | No ladder down |
|  | Feasibility | Time |
|  | Self-efficacy | Training |
|  | Inertia | Fear of worsening control |
|  | Inertia | Asthma death message |
|  | Inertia | Patient unkeen |
|  | Lack of awareness | Education |
|  | Inertia | Proactive |
|  | Inertia | Doctors bad at deprescribing |
|  | Inertia | Whose role it is |
|  | Lack of awareness | Not aware should be stepping down |
|  | Self-efficacy | Doctors start high doses so leave it |
|  | Lack of awareness | Step down if seasonal asthma only |
|  | Feasibility | Asthma review not include step down |
|  |  | FENO |
|  | Feasibility | Not heard of it |
|  | Feasibility | Not know value of it |
| **Suggestions of future approaches** |  | Training & education |
|  |  | Behavioural change |
|  |  | Recall patients |
|  |  | Patient ownership |
|  |  | Management plan |
|  |  | GP trial |
|  |  | Helpful/reassuring |
|  |  | Systematic approach |

Supplementary Table 4. Clinical commissioning groups (CCGs) of all survey participants.

| **CCG** | **N** |
| --- | --- |
| Barking and Dagenham | 1 |
| Barking and Havering | 1 |
| Barnet | 3 |
| Barnsley | 1 |
| Basildon and Brentwood | 1 |
| Belfast | 1 |
| Bexley | 1 |
| Birmingham and Solihull | 4 |
| Blackburn with Darwen | 1 |
| Blackpool | 1 |
| Bradford and Leeds | 1 |
| Brent | 2 |
| Bristol, North Somerset and South Gloucestershire | 3 |
| Bromley | 1 |
| Bucks | 1 |
| Bury | 1 |
| Calderdale | 2 |
| Cambridge & Peterborough | 2 |
| Camden | 6 |
| Canterbury and Coastal | 1 |
| Cardiff and Vale | 1 |
| Central London | 8 |
| Central Manchester | 1 |
| Central and eastern cheshire | 1 |
| City and Hackney London | 3 |
| Coastal west sussex | 3 |
| Cornwall and Isles of scilly | 2 |
| Cross City | 1 |
| Croydon | 3 |
| Cumbria | 1 |
| Cwm Taf LHB | 1 |
| Dartford Gravesham & Swanley | 7 |
| Derbyshire | 1 |
| Devon | 3 |
| Doncaster | 2 |
| Dorset | 1 |
| Dudley | 1 |
| Durham | 1 |
| Ealing | 5 |
| East Belfast | 1 |
| East Berkshire | 1 |
| East Cheshire | 1 |
| East Staffordshire | 1 |
| East Surrey | 1 |
| Enfield | 1 |
| Fareham | 1 |
| Glasgow GGC | 3 |
| Gloucestershire | 3 |
| Great Yarmouth and waveney | 1 |
| Greater Huddersfield | 1 |
| Greenwich | 2 |
| Hardwick | 1 |
| Halton | 1 |
| Hammersmith and Fulham | 3 |
| Haringey | 1 |
| Harrogate and Rural | 1 |
| Harrow | 4 |
| Havering | 5 |
| Herefordshire | 4 |
| Herts Valley | 1 |
| Hounslow | 1 |
| Islington | 2 |
| Jersey | 1 |
| Kent and Medway | 8 |
| Kernow | 1 |
| Lambeth | 2 |
| Lanarkshire, Scotland | 1 |
| Leeds, West Yorkshire | 6 |
| Leicestershire | 1 |
| Lewisham | 2 |
| Lincs | 1 |
| Liverpool | 2 |
| Lothian Scotland | 2 |
| Merton | 1 |
| Mid Essex | 1 |
| NHS Highland (Scotland) | 2 |
| NHS Lothian , Scotland | 3 |
| Nene | 1 |
| Newcastle Gateshead | 4 |
| Nhs Ayrshire and Arran | 1 |
| Nhs Grampian | 1 |
| No CCG, military doctor | 1 |
| Norfolk | 1 |
| North East Lincolnshire | 1 |
| North Kirklees | 1 |
| North Norfolk | 1 |
| North Tyneside | 1 |
| North West London | 2 |
| North hants | 1 |
| Northampton | 1 |
| Northern ireland | 6 |
| Norwich | 1 |
| Nottinghamshire | 2 |
| Oxfordshire | 10 |
| Portsmouth | 2 |
| Rotherham | 1 |
| SW Lincolnshire | 3 |
| Sandwell and West birmingham | 1 |
| Scotland | 3 |
| Scotland- Forth valley | 1 |
| Sheffield | 1 |
| Shropshire | 1 |
| Somerset | 3 |
| South Cynon | 1 |
| South East Hants | 1 |
| South Kent Coast | 1 |
| South Reading | 2 |
| South Staffordshire | 1 |
| South Tyneside | 1 |
| South Warwickshire | 1 |
| South east hants | 1 |
| South sefton | 1 |
| South worcestershire | 1 |
| Southend | 1 |
| Southern trust northern Ireland | 1 |
| Stockport | 1 |
| Stoke on trent | 1 |
| Sunderland | 1 |
| Surrey heartlands | 1 |
| Sussex | 2 |
| Swansea Bay | 2 |
| Tower Hamlets | 2 |
| Vale Royal | 2 |
| Wakefield | 1 |
| Walsall | 2 |
| Waltham Forest | 2 |
| Wandsworth | 1 |
| Warwickshire North | 2 |
| West Hampshire | 1 |
| West Kent | 1 |
| West Kent and Medway | 1 |
| West London | 7 |
| West Suffolk | 1 |
| West of Scotland | 1 |
| Westminster | 8 |
| Wirral | 3 |
| York | 1 |
| Yorkshire and Humber | 1 |
